# Supplementary material for: A novel human autoimmune syndrome caused by combined hypomorphic and activating mutations in ZAP-70
Source: PubMed Central journal article supplement — J Exp Med. 2016 Feb 8;213(2):155–65. doi: 10.1084/jem.20150888 (PMC4749924; doi:10.1084/jem.20150888), 2016-02-08
Supplement: supp_jem.20150888_JEM_20150888_sm.pdf [file supp_jem.20150888_JEM_20150888_sm.pdf]

## SUPPLEMENTAL MATERIAL

Chan et al., <http://www.jem.org/cgi/content/full/jem.20150888/DC1>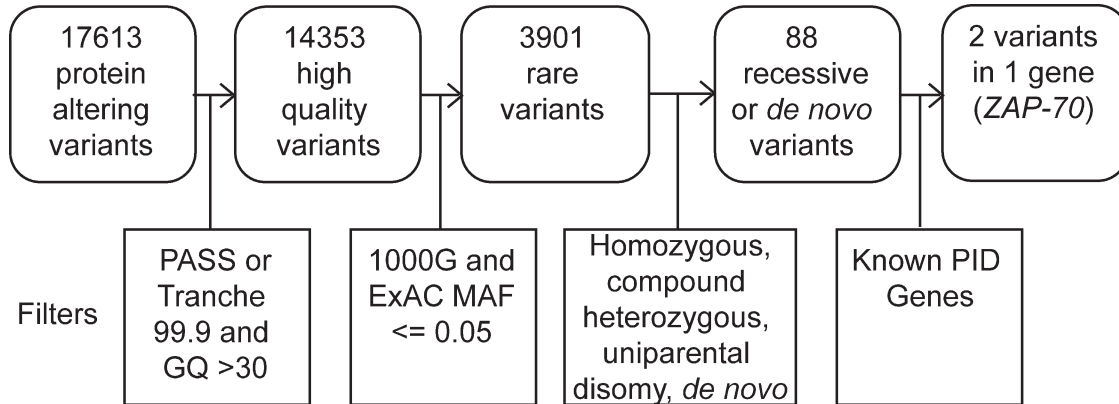

Figure S1. **Variant filtering on exome.** Data variant filtering for the affected siblings showing sequentially applied filters to yield a set of 3,901 variants that were further annotated based on the inheritance model. Highest priority was given to primary immunodeficiency genes; two shortlisted high quality variants were in *ZAP-70*.
